# Supplementary material for: Factors contributing to practitioner choice when declining involvement in legally available care: A scoping protocol
Source: PubMed Central journal article supplement — BMJ Open. 2018 Aug 17;8(8):e023901. doi: 10.1136/bmjopen-2018-023901 (PMC6104793; doi:10.1136/bmjopen-2018-023901), 2018-08-17
Supplement: bmjopen-2018-023901supp001.pdf [file bmjopen-2018-023901supp001.pdf]

## Appendix A

Database: Ovid MEDLINE(R) In-Process & Other Non-Indexed Citations, Ovid MEDLINE(R) Daily and Ovid MEDLINE(R) <1946 to Present> Search Strategy

- 1 conscientious objection.mp. (370)
- 2 Refusal to Treat.mp. or Refusal to Treat/ (2892)
- 3 Conscience/ (1379)
- 4 Ethical Relativism/ or ethical relativism.mp. (490)
- 5 objector.mp. (26)
- 6 objection.mp. (1412)
- 7 moral obligations.mp. or Moral Obligations/ (6379)
- 8 personal autonomy.mp. or Personal Autonomy/ (15789)
- 9 PROFESSIONAL AUTONOMY.mp. or Professional Autonomy/ (9519)
- 10 LEGISLATION, MEDICAL/es [Ethics] (66)
- 11 Attitude of Health Personnel.mp. or "Attitude of Health Personnel"/ (109553)
- 12 exp NURSES/ (81963)
- 13 exp PHYSICIANS/ (119185)
- 14 exp Health Personnel/ (455515)
- 15 1 or 2 or 3 or 4 or 5 or 6 or 7 (11710)
- 16 11 or 12 or 13 or 14 (513874)
- 17 7 or 8 or 9 or 10 (30148)
- 18 15 and 16 (2797)
- 19 17 and 18 (1567)
- 20 limit 19 to (english language and yr="1998 -Current") (717)
