# Supplementary material for: Factors contributing to practitioner choice when declining involvement in legally available care: A scoping protocol
Source: PubMed Central journal article supplement — BMJ Open. 2018 Aug 17;8(8):e023901. doi: 10.1136/bmjopen-2018-023901 (PMC6104793; doi:10.1136/bmjopen-2018-023901), 2018-08-17
Supplement: bmjopen-2018-023901supp002.pdf [file bmjopen-2018-023901supp002.pdf]

**Appendix B**

| Study Information<br>(year, author, country and journal) | Study Design (objectives, methodology, participant profession, and sample size) | Factors precipitating or influencing practitioner's participation in care (list) | List the reasons/factors that are in relation to conscience (list) | List the reasons/factors that are not related to conscience (list) | Healthcare practice area |
|----------------------------------------------------------|---------------------------------------------------------------------------------|----------------------------------------------------------------------------------|--------------------------------------------------------------------|--------------------------------------------------------------------|--------------------------|
|                                                          |                                                                                 |                                                                                  |                                                                    |                                                                    |                          |
